# Supplementary material
Source: PubMed Central journal article supplement (PMC3328598)
Supplement: NIHMS352522-supplement-Supp2.pdf [file NIHMS352522-supplement-Supp2.pdf]

**WT**

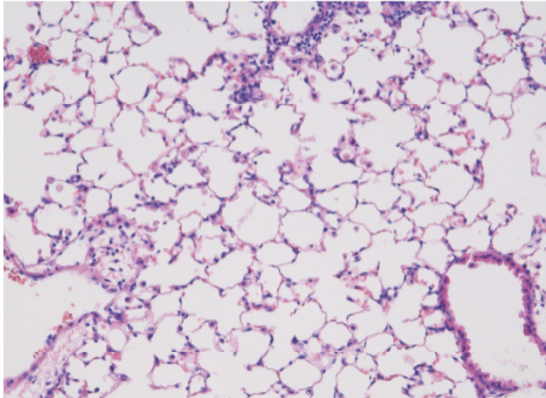

**IL6-KO**

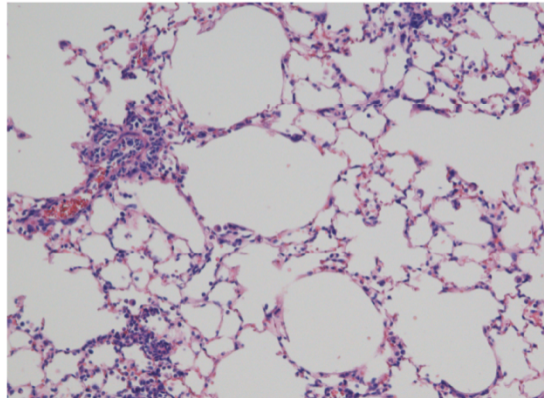

**IL6R-KO**

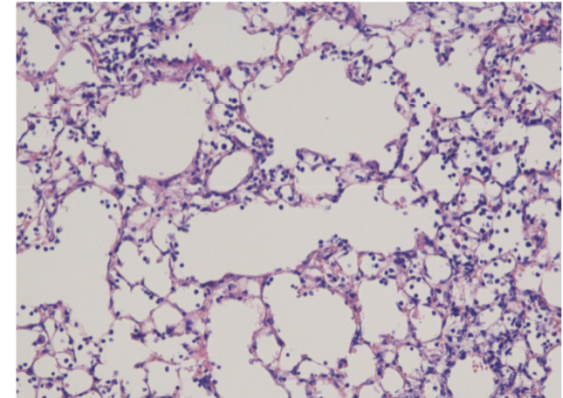

**Supplementary Fig. S1.** Histopathology of lungs from WT, IL-6 KO and IL-6R KO mice at day 11 p.i. with PR8 H1N1. 200x magnification of H&E stained lung sections are shown.

**WT**

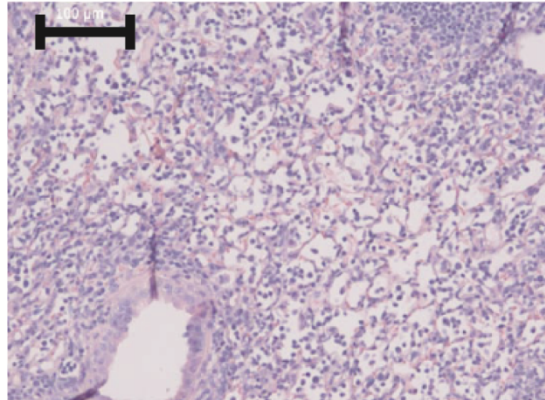

**IL6-KO**

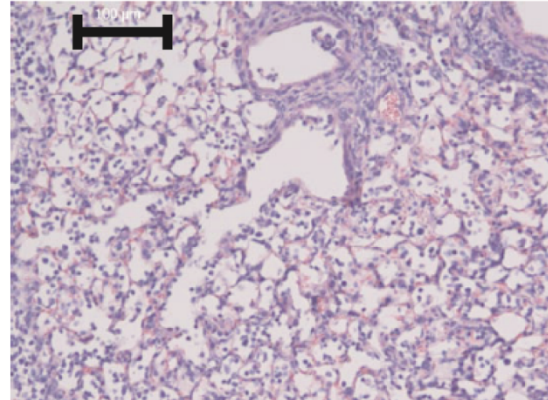

**Supplementary Fig. S2.** Histopathology of lungs from WT and IL-6 KO mice at day 7 p.i. with PR8 H1N1..200x magnification of H&E stained lung sections are shown. Size bars indicate 100 μm.
