# Supplementary material
Source: PubMed Central journal article supplement (PMC3328598)
Supplement: NIHMS352522-supplement-Supp3.pdf [file NIHMS352522-supplement-Supp3.pdf]

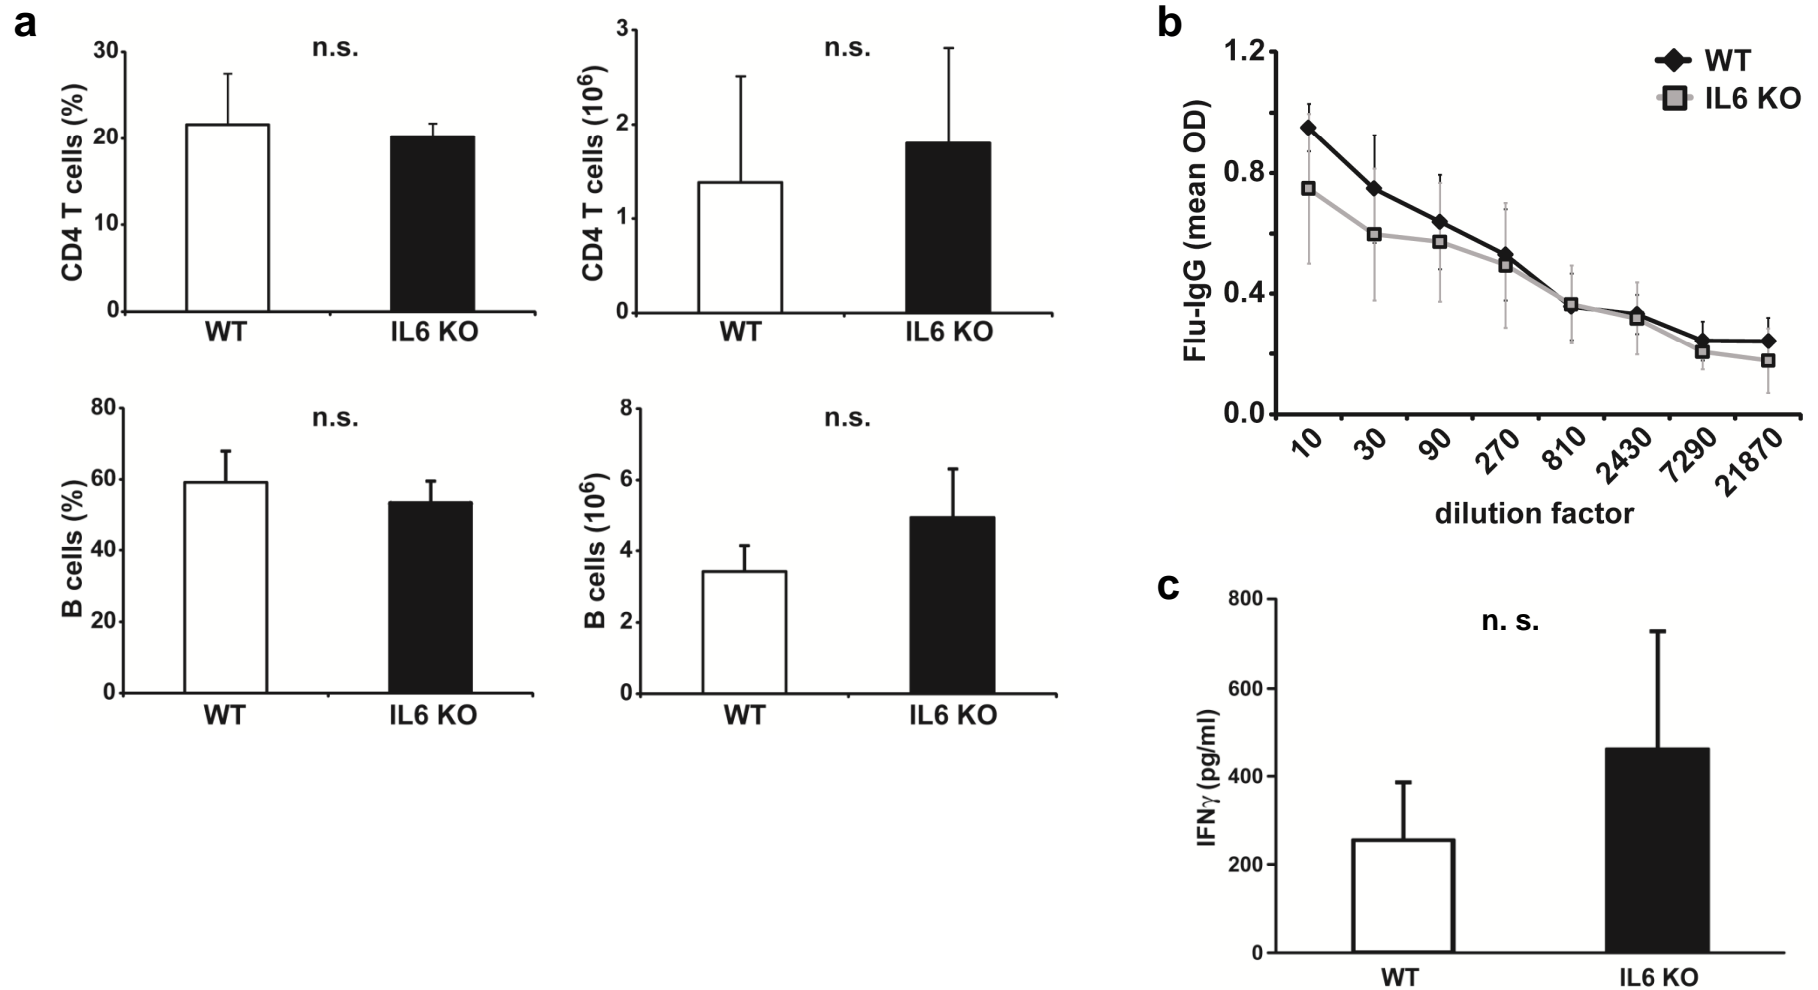

**Supplementary Fig. S3.** a) Percentage and total numbers of CD4 T cells and B cells in the mediastinal lymph nodes of WT and IL6 KO mice day 9. p. i. with PR8 influenza virus. (n. s. not significant; n = 5). b) Measurement of flu-specific total IgG in the serum of WT and IL6 KO mice day 9. p. i. with PR8 influenza virus. (n = 6). c) WT and IL6 KO mice were infected with PR8 influenza virus and BAL was obtained day 9 p. i. IFN $\gamma$  levels were determined by Luminex assay.

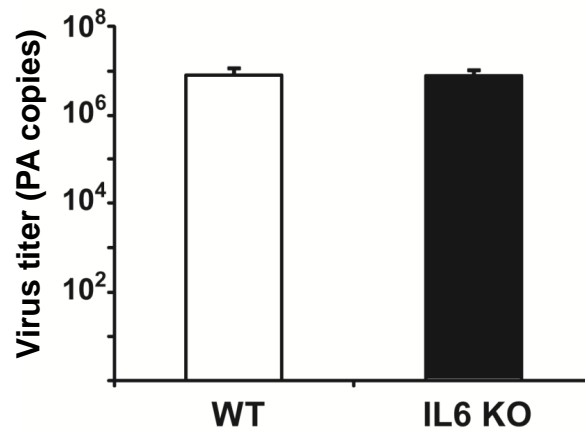

**Supplementary Fig. S4.** BAL cells from WT and IL6 KO mice were analyzed for PR8 PA copy number by real-time RT-PCR. (n=4).

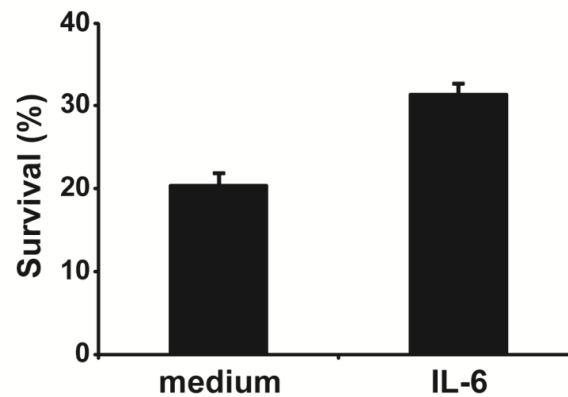

**Supplementary Fig. S5.** Neutrophils from WT mice were cultured in the presence or absence of IL-6 (20 ng/ml). After 24 h, live cells were counted by trypan blue staining. Values (mean  $\pm$  SD n=3) represent the frequency of live cells recovered relative to the initial number.
